## Mixed-model admixture mapping identifies smoking-dependent loci of lung function in African Americans

Andrey Ziyatdinov<sup>1</sup>, Margaret M. Parker<sup>2</sup>, Amaury Vaysse<sup>3</sup>, Terri H. Beaty<sup>4</sup>, Peter Kraft<sup>1</sup>, Michael H. Cho<sup>2,5</sup>, Hugues Aschard<sup>1,3</sup>

<sup>1</sup> Department of Epidemiology, Harvard T.H. Chan School of Public Health, Boston, Massachusetts, USA

<sup>2</sup> Channing Division of Network Medicine, Brigham and Women's Hospital, Boston, MA, USA

<sup>3</sup> Centre de Bioinformatique, Biostatistique et Biologie Intégrative (C3BI), Institut Pasteur, Paris, France

<sup>4</sup> Johns Hopkins Bloomberg School of Public Health, Baltimore, MD, USA

<sup>5</sup> Division of Pulmonary and Critical Care Medicine, Brigham and Women's Hospital, Boston, MA, USA

### Abstract

Admixture mapping has led to the discovery of many genes associated with differential disease risk by ancestry, highlighting the importance of ancestry-based approaches to association studies. However, the potential of admixture mapping in deciphering the interplay between genes and environment exposures has been seldom explored. Here, we performed a genome-wide screening of local ancestry-smoking interactions for five spirometric lung function phenotypes in 3,300 African Americans from the COPDGene study. To account for population structure and outcome heterogeneity across exposure groups, we developed a multi-component linear mixed model for mapping gene-environment interactions, and empirically showed its robustness and increased power. When applied to the COPDGene study, our approach identified two 11p15.2-3 and 2q37 loci, exhibiting local ancestry-smoking interactions at genome-wide significant level, that would have been missed by standard single-nucleotide polymorphism analyses. These two loci harbor the *PARVA* and *RAB17* genes previously recognized to be involved in smoking behavior. Overall, our study provides the first evidence for potential synergistic effects between African ancestry and smoking on pulmonary function and underlines the importance of ethnic diversity in genetic studies.

## Introduction

The study of genetically diverse populations has become a priority in public health research. Several major initiatives started in the past few years, including the National Institute of Health (NIH) Trans-Omics in Precision Medicine (TOPMed) Program that aims to sequence over a hundred of thousands whole genomes from a variety of ancestries. These initiatives compensate for the lack of participants of non-European ancestries in genetic studies<sup>1-3</sup>. Besides addressing health disparities among ethnic groups, studies of multi-ethnic cohorts and admixed populations can provide important information about the biology of complex diseases and help to identify associated genes<sup>4</sup>. Recently admixed populations, such as African Americans, represent a special case of multi-ethnic cohorts with mosaic chromosomes derived from several ancestral populations. Admixture mapping, often applied to recently admixed populations, searches for genomic loci of unusual local ancestry at a putative disease risk locus compared with the genome-wide average<sup>5</sup>. Findings for respiratory disease, chronic renal disease, prostate cancer and systemic lupus erythematosus have been reported as results of admixture mapping<sup>7-12</sup>.

The data analysis in admixture mapping consists of two main steps, inferring local ancestry and testing for association between every local ancestry segment and an observed phenotype. Given unobservable ancestry information, current methods on ancestry inference probabilistically define the location of every ancestral switch using genotyping array data, reference haplotypes and algorithms based on hidden Markov models<sup>6,35</sup>. These methods were empirically shown to produce reliable results on African Americans<sup>40</sup>, as they represent a relatively simple two-way admixture and are well modeled by available reference panels<sup>41</sup>. The standard approach for association testing is similar to genome-wide association studies (GWAS) on single-nucleotide polymorphisms (SNPs) and runs linear regression to estimate the correlation between local ancestry and phenotype. To avoid confounding due to population structure that is inherently present in admixed individuals, most studies also included global ancestry components (i.e. the genome-wide proportions of ancestry derived from each ancestral population) as covariates. Going beyond linear regression, the framework of linear mixed models was applied to quantify individual similarities by ancestry, showing how the phenotypic variance is explained by local ancestry<sup>42</sup> and linking it to the heritability of complex traits estimated from SNP data<sup>20</sup>. Notably, linear mixed models have not yet been applied in admixture mapping despite several potential advantages<sup>35</sup>.

Recently, we found that the correlation between local ancestry and untyped causal variants can be leveraged to detect distant gene-gene interactions in admixed populations through local ancestry-local ancestry screening<sup>18</sup>. That work also demonstrated that the power of such admixture mapping increases with the number of causal variants within local ancestry tested and with the degree of differentiation of variants between the ancestral populations. Here, we suggest that the same principle can be applied to search for gene-environment interactions. Regarding previous studies of gene-environment interactions, most works focused on interactions between the global ancestry and environmental factors using linear regression<sup>16,19-21</sup>. Since here we sought to screen for local ancestry-environment interactions, a type of admixture mapping seldom explored, we argue that such application might face multiple methodological challenges due to both population stratification and outcome heterogeneity among individual groups stratified by environmental exposure. Hence, the use of linear mixed models will be particularly relevant to account for complex genetic and environmental relationships in admixed individuals.

Application of admixture mapping to lung function phenotypes in African Americans is especially relevant<sup>13</sup>. European Americans and African Americans are well known to show differences in spirometric measures of lung function such as forced expiratory volume in one second (FEV<sub>1</sub>) and forced vital capacity (FVC) with higher values for these two traits for European Americans. Factors partially

responsible for these differences include body habitus, early-life development conditions, socioeconomic status and other environmental factors<sup>14,15</sup>. Previous studies showed strong evidence that the proportion of African global ancestry is associated with lower lung function for a given ranges of height and age<sup>13,16</sup>. Also, the higher proportion of African ancestry in African Americans was associated with an additional decrease in lung function for smokers<sup>17</sup>.

To address the aforementioned methodological challenges, we used real data and proceed in a step-wise assessment of multi-component linear mixed model in order to define a robust interaction test of association. More precisely, we conducted a genome-wide scan of local ancestry-smoking interactions for five spirometric lung function phenotypes available in 3,300 African-Americans from the COPDGene study<sup>22</sup>. The search for gene-environment interactions related to pulmonary function phenotypes in the COPDGene study is particularly relevant, as it is one of the largest studies of African-American smokers. In result, our application of the proposed linear mixed model identified two genome-wide significant and five suggestive loci that would have been missed in standard single SNP-based approaches.

## Materials and Methods

### *The COPDGene dataset*

In the analysis of COPDGene study, we focused on five correlated quantitative pulmonary phenotypes: forced expiratory volume in one second ( $FEV_1$ ); forced expiratory volume in one second as a percent of predicted ( $FEV_1$  % predicted); forced vital capacity (FVC); forced vital capacity as a percent of predicted (FVC % predicted); and the ratio of forced expiratory volume in one second to forced vital capacity ( $FEV_1/FVC$ ). We derived two binary smoking exposures from the number of cigarettes smoked per day for gene-environment interactions: current smoker exposure (current smokers vs. former smokers) and heavy smoker exposure (current heavy smokers vs. current moderate smokers). We defined moderate current smokers with 1-14 cigarettes per day on average, while heavy current smokers were defined as with >14 cigarettes per day on average. When using heavy smoker exposure in the analysis, we excluded all subjects who were former smokers.

Locus-specific ancestry or local ancestry was inferred from genotype data as previously described<sup>22</sup>. Briefly, we used the LAMP-LD program<sup>37</sup> to estimates local ancestry per individual using a hidden Markov model (HMM) algorithm comparing observed genotypes and haplotypes from reference ancestral populations. We parametrized the algorithm with 15 HMM states, a window size of 50 SNPs, and used 99 CEU and 108 YRI unrelated individuals from the 1,000 Genomes Project (Phase III)<sup>38</sup> as reference panels. Per SNP estimates of African ancestry were further used in two post-processing steps. First, we averaged the local ancestry per individual to derive the genome-wide proportion of African ancestry (i.e. the global ancestry). Second, we estimated local ancestry segments by merging neighboring SNPs with identical values. We next filtered out short ancestry segments of length less than 10,000 bases to mitigate possible artifacts of the inference procedure that might affect further admixture mapping analysis<sup>39</sup>.

### *Step-wise model selection for admixture mapping*

Consider a quantitative trait stored in a  $n$ -dimensional vector  $y$  and a  $n \times m$  data matrix  $Z$  of local ancestry segments, where  $n$  is the number of individuals and  $m$  is the number of local ancestry segments. Let  $z_l$  be a column of matrix  $Z$  corresponding to a single local ancestry segment, and  $x_e$  being a  $n$ -dimensional column vector of a binary environmental exposure. We aim at testing the statistical interaction between the local ancestry segments  $z_l$  and the exposure  $x_e$  on the phenotype  $y$ . As discussed in **Supplementary Material**, we are interested to assess a fixed effect of interaction  $z_l \times x_e$

using the standard *Wald* test, while controlling for variance related to local ancestry, global ancestry and exposure that might confound the estimate of effect. However, in regards to potentially non-trivial structure in the data, due to both ancestry admixture and potential heterogeneity of outcome across exposure groups, we defined our association model using a step-wise approach, where the model complexity was incremental until reaching the desired criteria of validity. Following standard practices<sup>44</sup>, these criteria were designed 1) to reach a genomic inflation parameter ( $\lambda$  close to one, and 2); to achieve an overall shape of the standard quantile-quantile plot (QQ-plot) of the  $-\log_{10}(P)$  matching the expected uniform distribution of p-values for the majority of the tests.

In practice, before evaluating interaction effects, we first assessed the robustness of a standard linear mixed model (LMM) when testing for the marginal effect of local ancestry  $z_l$  only:

$$y = C\beta_C + \beta_e x_e + \beta_g z_g + \beta_l z_l + u_c + e(1)$$

where  $C$  is a matrix of trait-specific covariates and  $\beta_C$  is a vector of their fixed effects;  $z_g$  is a vector of global; and  $\beta_e, \beta_g, \beta_l$  are fixed effects of exposure, global ancestry and local ancestry, respectively. The random effects include a vector of the residual errors  $e$  and a vector of random effect  $u_c$  encoding whether two given individuals belong to the same medical center. We further added additional random effect components (described below) in the LMM, which importance was assessed incrementally (**Supplementary Table S1**). We next included our parameter of interest, the local ancestry-exposure interaction effect, on top of random effect components selected at the previous step and continued our assessment of additional components until reaching the desired characteristics. Our full and final LMM was defined as follows:

$$y = C\beta_C + \beta_e x_e + [\beta_g z_g + \delta_g z_g x_e] + [\beta_l z_l + \delta_l z_l x_e] + u_m + u_i + u_h + u_c + e(2)$$

where, in addition to notation in Equation (1),  $z_g \times x_e$  and  $z_l \times x_e$  represent interactions between global and local ancestries and exposure, respectively;  $\delta_g$  and  $\delta_l$  are fixed effects of interactions between global ancestry and local ancestry and exposure, respectively. The first vector of additional random effects  $u_m$  captures the variance of local ancestry remaining after taking into account the global ancestry as a fixed effect ( $z_g$ )<sup>42,43</sup>. The variance-covariance matrix of  $u_m$  is the ancestral relationship matrix (ARM) derived by the cross-product operation on column-wise centered and scaled  $Z$  matrix<sup>43</sup>. The second vector  $u_i$  complements the previous vector  $u_m$  and comes out due to testing the interaction effect ( $\delta_l$ ) rather than the marginal effect ( $\beta_l$ )<sup>34</sup>. The variance-covariance matrix of  $u_i$  is derived from ARM based on stratification by binary environmental exposure status ( $x_e$ )<sup>34</sup>. We refer to this matrix as environmental ARM or EARM. The third vector  $u_h$  models the heterogeneity of phenotypic variance across the three smoking groups. The variance-covariance matrix of  $u_h$  is a diagonal matrix, where entries are the same if they correspond to the same group.

### **Multi-phenotype analysis**

We first conducted single-trait admixture mapping of gene-environment interactions for each of the five pulmonary traits considered and each of the two exposures (current smoker and current heavy smoker). However, these five spirometric lung function measurements are all highly correlated and likely share genetic association signals. To reduce the penalty for multiple testing and potentially increase power, we focused our primary screening on a multivariate association tests combining single-trait signals separately for each exposure without assuming any prior on the direction of the single-trait effects<sup>45-48</sup>. In practice, given five Z-scores for a local ancestry segment, stored in a vector  $S_{5 \times 1}$ , we estimated the multivariate Z-score  $S_{joint}$  in two steps. We first estimated  $\Sigma_{5 \times 5}$ , the variance-covariance matrix among Z-scores under the null hypothesis of no association and then, for each local ancestry segment, we derived the multivariate statistics using the *Mahalanobis* distance, defined as:

$$S_{joint} = S^T \hat{\Sigma}^{-1} S(3)$$

which squared statistics  $T = S_{joint}^2$  follows a  $\chi^2$  distribution with 5 degrees of freedom under the null composite hypothesis of no interaction effect on any of these five traits. For the estimation of  $\Sigma$ , previous works suggested using the complete Z-score data from the genome-wide scan, i.e.  $\hat{\Sigma} = S^T S$ , assuming that the vast majority of Z-scores are distributed under the null<sup>46,48</sup>. Here, we made the same assumption and additionally discarded large single-trait Z-scores above a given threshold to reduce the risk of bias. Further, we approximated  $\hat{\Sigma}$  from the resulting truncated multivariate normal distribution by the maximum likelihood estimation. We empirically found the best threshold value equals 3 for our admixture mapping Z-scores (**Supplementary Material**).

### **Follow-up analysis**

We performed association and further fine-mapping analysis using genotyped data, following up regions identified by admixture mapping. Considering  $x_g$  is a vector of genotypes for a single SNP, we extended the interaction model (Equation 2) by adding two terms for marginal genetic ( $x_g$ ) and interaction ( $x_g \times x_e$ ) effects. Note that the exposure term ( $x_e$ ) was already included in this model. We performed a univariate *Wald* test with one degree of freedom to derive the *p*-value for interaction effect between genotype and exposure. By including a local ancestry term when testing for the interaction effect of genotype, we accounted for possible different LD patterns for European and African ancestral backgrounds<sup>49</sup>. Such conditional analysis can reduce power but assures that the interaction effect of genotype is driven by a biological mechanism rather than a better SNP tagging in a particular ancestral population.

As discussed in our previous work<sup>18</sup>, we expected SNPs in regions of local ancestry-smoking interactions to show multiple-SNP effects on the trait as well as high allelic frequency differentiation at SNPs between ancestral populations. Hence, we performed comparative study of allelic frequencies between the two ancestral populations and fine-mapping analysis to assess the potential presence of multiple causal variants. First, we computed allele frequency differences ( $\Delta DAF$ )<sup>50</sup> at all SNPs to measure the allelic heterogeneity between European and African population groups from the 1,000 Genomes Project (Phase III)<sup>38</sup>. The  $\Delta DAF$  measures were previously found to be highly correlated with Weir and Cockerham's  $F_{ST}$  in the 1,000 Genomes sample<sup>51</sup>. We assessed cases of extreme  $\Delta DAF$  in the regions of interest by comparing the observed value against the threshold proposed by Colona et al.<sup>24</sup> In brief, that study grouped 36.8 million variants in African and European populations from the 1,000 Genomes Project<sup>38</sup> into bins of non-overlapping sets of 5,000 variants and derived the distribution of the maximum  $\Delta DAF$  for further comparisons. Second, we applied a Bayesian method implemented in the software package FINEMAP<sup>52</sup> to estimate the posterior probability of each single SNP interaction to be causal, conditionally on in-sample linkage disequilibrium pattern. FINEMAP implements a shotgun stochastic search algorithm to efficiently explore the most likely causal configurations, and we ran FINEMAP with the default parameters on the maximum number of causal SNPs (5), prior probabilities on the number of causal SNPs and the prior probabilities of a single SNP to be causal.

## **Results**

### **Participants characteristics and description of traits**

We used a dataset of 3,300 African American research volunteers from the Genetic Epidemiology of COPD (COPDGene) study<sup>23</sup>. Self-identified non-Hispanic African Americans and non-Hispanic European

Americans between 45 and 80 years of age with a history of at least 10 pack-years of smoking were enrolled from 21 medical centers across the US. Details on phenotyping, genome-wide genotyping of the cohort and inference of local ancestry are provided in Methods and **Supplementary Material**.

Individual characteristics of the COPDGene dataset are described in **Table 3** for the whole sample and stratified by current smoking status: non-smokers, moderate smokers (1-14 cigarettes per day) and heavy smokers (>14 cigarettes per day). The three smoker groups have similar overall characteristics, although there are some differences due to the COPDGene study enrollment protocol: the current smokers are younger and have higher proportions of males; non-smokers have higher numbers of accumulated pack-years. After stringent quality control procedure (**Supplementary Figures S8-S9** and **Supplementary Table S7**), we observed a total of 30,043 local ancestry segments. The distribution of proportions of local African ancestry (averaged across individuals) is roughly uniform along the genome (**Figure 1a**), confirming that the local ancestry data were free from artifacts. The proportion of global African ancestry ranged between 26.3% and 99.8% across individuals with an average of 80.3% (**Figure 1b**). We confirmed that individuals with higher proportions of African ancestry tend to have lower pulmonary function at a highly significant level ( $P < 0.001$ , **Supplementary Table S4**) for all the traits except FEV<sub>1</sub>/FVC. We also assessed the variance heterogeneity among the smoking groups (not current smokers; moderate current smokers and heavy current smokers) by its explicit modeling as random effects (Equation 2). Both exploratory data analysis (**Supplementary Figure S7**) and formal statistical tests ( $P < 0.0001$  for all traits; **Supplementary Table S5**) highlighted differences among these three groups not only by mean, but also by variance (the group of non-smokers has the largest variance).

### ***Mixed model to account for population structure and variance heterogeneity***

To address the methodological question of performing a test of local ancestry-exposure interaction in admixed population, we chose a data-driven approach where the robustness of candidate models was assessed using the genomic control parameter ( $\lambda$ ) and the overall shape of the standard quantile-quantile plot (QQ-plot) of the  $-\log_{10}(\text{p-value})$ . We started with the simplest model testing the marginal effect of local ancestry, and incrementally added terms necessary for robust testing of local ancestry-exposure interaction, our main parameter of interest.

We proposed to use a linear mixed model (LMM) including up to four random effects:  $u_m$ ,  $u_i$ ,  $u_h$ , and  $u_c$ , capturing structure due to shared local ancestry, local ancestry-smoking interaction, smoking status, and recruitment medical center, respectively. We added each of these components into the model through a step-wise procedure, assessing their relative contribution in various combinations. All variance-covariance matrices for the random effects observed in real data are illustrated in **Supplementary Figure S10**, while additional details of the model selection are provided in **Supplementary Material**.

We used the FEV<sub>1</sub>% predicted phenotype as an illustrative scenario and started with a marginal association model for single-trait admixture mapping (**Figure 2a**) (i.e. without ancestry-environment interaction; see also **Supplemental Notes** and **Supplementary Table S1**) including only  $u_c$  as there was strong heterogeneity in the distribution of traits by medical center. Marginal local ancestry statistics in this initial model showed substantial inflation ( $\lambda = 1.19$ ). We further accounted for correlation by genome-wide local ancestry across individuals, which was done by modeling the ancestral relationship matrix (ARM) (the  $u_m$  random effect in Equation 2). The addition of the ARM component substantially mitigated the inflation ( $\lambda = 1.04$ , **Figure 2b**). We next considered adding the  $u_h$  random effect that captured substantial portion of variance of modeled traits (**Supplementary Table S5**). This additional parameter did not impact the overall distribution of p-values ( $\lambda = 1.03$ ), but resulted in an improved power of admixture mapping (the average of top statistics with  $P < 0.001$  increased from 11.95 to 12.41), likely due to reduced amount of the residual variance after modeling the heterogeneity.

We then expanded the LMM to address the model components related to testing local ancestry-smoking interactions (Equation 1 and **Supplementary Table S1**). Following the exploration of the marginal model, we examined the role of four random effects by conducting admixture mapping for a single trait and the current smoker exposure in different model configurations (**Figure 2b**). Overall, the association test statistic was substantially inflated ( $\lambda = 1.61$ ) if none of the three components were modeled. Including the components separately in the model, either the heterogeneity component, one genetic component with ARM or two genetic components, was not sufficient to fix the inflation ( $\lambda = 1.16, 1.6$  and  $1.39$ , respectively). The association test statistic was well-behaved only when all three components were included ( $\lambda = 1.06$ ). Hence, our final model (Equation 2) for admixture mapping of local ancestry-smoking (gene-environment) interaction included three additional random effects that capture structures due to shared local ancestry, local ancestry-smoking interaction and outcome heterogeneity across smoking groups.

### ***Local ancestry-smoking interactions detected by admixture mapping***

We conducted admixture mapping of local ancestry-environment interaction for all five spirometric traits considering the two binary exposures independently (**Supplementary Figures S1 and S2**). Single-trait statistics showed limited inflation for all analyses ( $\lambda = 0.93$ - $1.09$ ), except for FEV<sub>1</sub>/FVC and current smoker exposure ( $\lambda = 1.12$ , **Supplementary Figures S4 and S5**). For each exposure, single trait results were combined to form a multi-trait test (**Figure 3**). The two multi-trait analyses show a well-controlled type I error rate ( $\lambda = 0.98, 1.02$ , **Supplementary Figures S6**). Following the *eigenMT* approach<sup>18</sup>, we estimated the number of effective tests to be 1,635 (**Supplementary Material**) and, thus, reduced the multiple-testing burden from the Bonferroni threshold ( $0.05/30,043 = 1.51 \times 10^{-6}$ ) to the effective Bonferroni threshold ( $0.05/1,635 = 3.06 \times 10^{-5}$ ). We also considered the suggestive Bonferroni threshold ( $0.5/1,635 = 3.06 \times 10^{-4}$ ) to select additional candidate loci of interest.

We identified two genome-wide significant and five suggestive interaction association signals (**Table 2**). The first genome-wide significant locus in the region chromosome 11p15.2-3 spanned 11 ancestry segments of average length 37Kb and 17 SNPs. The top ancestry segment Chr11: 12,341,061-12,373,680 of length 32,619b and 21 SNPs had a multi-trait positive interaction effect with current smoker exposure with multi-trait  $Z = 5.34$  and  $P = 2.79 \times 10^{-5}$ . The signal was driven by all single-trait associations, where all  $p$ -values passed the suggestive Bonferroni threshold. The top single-trait association for FEV<sub>1</sub> % predicted showed  $Z = 4.53$  and  $P = 5.86 \times 10^{-6}$ . That top single-trait ancestry segment was 47kb away from the top multi-trait one, but the two segments were highly correlated after adjusting for the global ancestry (the Pearson correlation coefficient equaled 0.98). The second genome-wide significant locus in chromosome 2q37.3 included 11 ancestry segments of length 32Kb and 9 SNPs on average. The strongest multi-trait and top single-trait (FEV<sub>1</sub>) association signals were both localized in the same ancestry segment Chr2: 238,430,224- 238,486,767 of length 56,543b and 21 SNPs. The positive interaction effects with the current heavy smoker exposure showed  $Z = 5.34$  and  $P = 2.90 \times 10^{-6}$ , and  $Z = 4.53$  and  $P = 2.50 \times 10^{-6}$  for multi-trait and top single-trait associations, respectively.

The other five suggestive loci (**Table 2**) were mostly detected in the interaction admixture mapping with current heavy smoker exposure (13q12.3-13.1, 11q21, 7p15.2-3 and 8q21.13), except one locus 1q44 from the mapping with current smoking exposure. In contrast to the genome-wide significant loci, multi-trait association signals were much stronger than top single-trait signals for all suggestive loci (the difference in  $p$ -values was several orders of magnitude for some tests).

### ***Genotype-smoking interactions reveal differentiated genetic variants***

For each region showing at least suggestive significance in the multi-trait admixture mapping analysis, we assessed potential interactions of single SNPs available in the region around the top

admixture signal. We conducted association analysis for a total of 888 SNPs available across the 7 regions lying within ancestry segments (the average number of SNPs per region was 126.9, and the average number of SNPs per segment was 13.7). Here, we focused on the single trait showing the largest association signal in the admixture mapping. Overall, none of these SNPs passed a stringent Bonferroni correction threshold accounting for all SNPs tested in each region. However, the top SNPs especially in the genome-wide significant loci helped to localize the association signal (**Table 3**). In the first genome-wide significant region 11p15.2-3 (**Figure 4**), the top SNP rs933920 ( $P = 0.0036$ ) is an intronic variant in the *PARVA* gene (MIM 608120). In the second genome-wide significant region 2q37.3 (**Figure 4**), the first top SNP rs7569427 ( $P = 0.02$ ) was an intronic variant in the *MLPH* gene (MIM 606526), and second top SNP rs2280289 ( $P = 0.036$ ) was a missense variant in the *RAB17* gene (MIM 602206).

To assess the level of allelic heterogeneity of SNPs in these identified regions, we computed the allele frequency differences (defined as  $\Delta DAF$  in **Materials and Methods**). The SNPs exhibited high levels of heterogeneity for all regions ( $\Delta DAF$  in 0.62 and 0.78). Overall, 3 out of our 7 loci (1q44, 2q37.3 and 8q21.13) matched the 0.7 threshold proposed by Colonna *et al.*<sup>24</sup>, defining the 1% of the genome displaying the most extreme differentiation across populations. These differences in minimum allele frequency (MAF) between European and African ancestries can also be visually assessed on **Figure 4** and **Supplementary Figures S12-15**. Finally, we also evaluated the hypothesis of multiple causal SNPs per region using the FINEMAP software<sup>21</sup>, but we were not able to find any strong evidence for multiple causal SNPs (**Supplementary Table S6**).

### **Replication of association signals in European GWASs**

We performed replication analyses of association signals detected at individual SNP-level and gene-level, for the seven loci reported in **Tables 2-3**. We considered two large studies of pulmonary phenotypes and COPD conducted in individuals of European ancestry: the CHARGE consortium (N = 50,047) which had genome-wide summary results for SNP-by-smoking interaction<sup>53</sup>; and the most recent and largest meta-analysis of UK Biobank and SpiroMeta cohorts (COPD cases = 35,735, COPD controls = 222,076; N = 400,102 for pulmonary function phenotypes) which provides an up-to-date list of variants with genome-wide significant marginal genetic effect.<sup>54,55</sup>

Matching our nine top SNPs with the CHARGE consortium results<sup>53</sup>, we found that three were missing, being rare or monomorphic in European population. Interaction effects of three of out the six remaining SNPs were replicated at the nominal significance level ( $P < 0.05$ ) (**Supplementary Table S8**) in SNP-smoking interaction screening of FEV<sub>1</sub>/FVC, where packs-years was used as a proxy for heavy smoking. We also assessed the joint SNP and SNP-smoking association reported in the CHARGE consortium<sup>53</sup> in all seven loci. Although, no loci display genome-wide significant association, we observed that all but one showed at least one SNP with association signal at the level of  $P < 0.0001$  (the strongest signal for rs10202058 with  $P = 1.92 \times 10^{-6}$  in the 2q37.3 locus).

We next assessed the presence of marginal genetic effect at our seven loci using the aforementioned meta-analysis of pulmonary phenotypes<sup>54</sup> and COPD<sup>55</sup>. Although our marginal signals of top local ancestry segments and SNPs were weak (**Supplementary Table S10-11**), we observed that nine genome-wide significant SNPs from GWASs<sup>54,55</sup> were located less than 1Mb away from the three loci 2q37.3, 11p15.2-3 and 7p15.2-3 (**Supplementary Table S9**). In particular, two SNPs rs80145403 and rs80145403 were within the same *PARVA* and *TEAD1* genes in Chromosome 11 as in our SNP-smoking interaction analysis (**Table 3**). Notably, five SNPs come from two loci that each has three distinct signals estimated by the conditional analysis<sup>55</sup>. Such a scenario with multiple SNPs driving either marginal or interaction association is beneficial for our ancestry-based approach to detect gene-environment interactions, and, thus, may explain the signal overlap at the gene-level for two 11p15.2-3 and 2q37.3 loci.



## Discussion

Broadening the diversity of ethnicities in genetic analysis can provide important information for disease pathogenesis. Leveraging local ancestry through admixture mapping could improve power to discover marginal genetic and gene-environment effects, although the technical and statistical challenges still remain. To address these challenges, we introduced a multi-component linear mixed model and empirically demonstrated its robustness in admixture mapping on real data in 3,300 African American participants in the COPDGene study. We detected two genome-wide significant and five suggestive loci showing smoking-dependent effects of local ancestry on spirometric lung function phenotypes.

While the functional effects of variants in the identified genomic regions is unknown, these regions harbor genes previously known for traits related to smoking. The top SNP rs93392 in the first genome-wide significant locus 11p15.2-3 ( $P = 2.79 \times 10^{-5}$ ) is located within the *PARVA* gene, which produces a focal adhesion protein<sup>25</sup>. Two previous studies reported that this gene was differentially methylated in small airway epithelium<sup>26</sup> and buccal mucosa<sup>27</sup> when stratified by current smoking status. The second top SNP rs2280289 for the second genome-wide significant region on 2q37.3 ( $P = 2.90 \times 10^{-5}$ ) is a missense mutation in *RAB17*, which was previously associated with a smoking cessation genotype success score<sup>28,29</sup>. As for the most relevant result found among the five suggestive loci, the top SNP rs11020968 in the locus 11q21 ( $P = 5.0 \times 10^{-5}$ ) is a missense mutation for angiotenin-like protein 1 (*AMOTL1*; MIM 614657), a tight junction protein hypothesized to play a role in COPD through endothelial tight junction permeability, and whose expression is affected by cigarette smoking<sup>30</sup>. Additional genes around other loci may warrant further investigation.

We further attempted to evaluate whether SNPs within these identified regions show multiple-SNP effects and exhibit high allelic differentiation, as our previous work on gene-gene interaction admixture mapping suggested this kind of genetic architecture<sup>18</sup>. Overall, allele frequency heterogeneity between European and African ancestries was very strong and persistent in the identified regions. Although our fine-mapping analysis did not show evidence for multiple causal variants, SNP-smoking interaction analysis is known to have limited power<sup>31</sup>; thus, we cannot rule out the possibility of multiple causal variants. Indeed, the conditioning on the primary signal of local ancestry is likely to decrease the statistical power to detect interactions at the SNP level even in larger samples<sup>31</sup>. Alternative methods, such as jointly modeling ancestry and genotype association signals, might help to overcome this limitation<sup>32</sup>.

Our methodological contributions to admixture mapping are multiple. First, we extended the concept of genetic relationship matrix originally proposed to control population structure in GWAS<sup>33</sup>: the ancestry relationship matrix (ARM) was similarly computed on local ancestry data and further used in association tests. Second, we adopted the population stratification approach recently designed specifically for GWAS of gene-environment interactions<sup>34</sup>: two matrices, the standard ARM, but also a second environmental ARM or EARM, were essential to control for spurious association results when testing local ancestry-environment interactions. Finally, we modeled the outcome heterogeneity among groups stratified by environmental exposure. Modeling this heterogeneity increased the power because of reduced residual phenotypic variance (up to 65%); and substantially decreased the inflation of interaction test statistic.

Our study also has limitations. COPDGene is one of the largest studies of African-American smokers, with a high proportion of subjects with COPD, which makes suitable replication cohorts challenging. Nevertheless, we were able to reproduce some of the top SNP-smoking interactions in the CHARGE consortium<sup>53</sup> at nominal significant level. More importantly, our study identified 3 loci 2q37.3, 11p15.2-3 and 7p15.2-3 using a dataset of only 3,300 African-American individuals, while the same loci only passed

the genome-wide significance threshold of standard univariate association in an independent replication cohort including up to 400,000 individuals<sup>54,55</sup>. Further, the method for admixture mapping can also be optimized. When conducting association analysis, excluding the local ancestry segment under testing from the ARM construction will be able improve power<sup>35</sup>, but is computationally more burdensome. We attempted a more efficient out-of-chromosome strategy commonly applied in GWAS<sup>36</sup>, but we observed fairly inflated test statistics (data not shown).

In conclusion, our study reports a powerful approach for gene-environment interaction association studies, leveraging the unique genetic architecture of complex traits measured in recently admixed populations. The proposed statistical model has shown to be robust to population structure and outcome variance heterogeneity. In our application to the COPDGene study, we have found two genome-wide significant local ancestry-smoking interactions of lung function phenotypes that would have been missed in standard single SNP interaction analyses. Overall, our findings provide additional evidence of the importance of ethnic diversity in genetic clinical studies.

## Acknowledgements

This project was supported by NHGRI R21HG007687 (A.Z., H.A. and M.H.C.), and NHLBI R01HL113264 and R01HL137927 (M.H.C.) The COPDGene study (NCT00608764) is supported by NHLBI R01 HL089897 and R01 HL089856, and the COPD Foundation through contributions made to an Industry Advisory Board composed of AstraZeneca, Boehringer Ingelheim, Novartis, Pfizer, GlaxoSmithKline, Siemens, and Sunovion. M.H.C. has received grant support from GSK. The content is solely the responsibility of the authors and does not necessarily represent the official views of the National Heart, Lung, and Blood Institute or the National Institutes of Health. Additional information can be found in the **Supplemental Material**.

## Code and Data Availability

Code used here for admixture mapping,

<https://gist.github.com/variani/a28c18797c39a62bacab587e6e708529>

The 1,000 Genomes Project (Phase III, version 5),

<http://csg.sph.umich.edu/abecasis/mach/download/1000G.Phase3.v5.html>

LAMP-LD software for ancestry inference, <http://bogdan.bioinformatics.ucla.edu/software/lamp/>

Gaston R package for mixed models, <https://cran.r-project.org/package=gaston>

Public GWAS summary-statistics from the CHARGE consortium, the dbGaP database, study accession phs000930.v3.p1, [https://www.ncbi.nlm.nih.gov/projects/gap/cgi-](https://www.ncbi.nlm.nih.gov/projects/gap/cgi-bin/study.cgi?study_id=phs000930.v3.p1)

[bin/study.cgi?study\\_id=phs000930.v3.p1](https://www.ncbi.nlm.nih.gov/projects/gap/cgi-bin/study.cgi?study_id=phs000930.v3.p1)

OMIM, <http://www.omim.org>

## Tables

**Table 1. Characteristics of African American participants in the COPDGene project.**

|                            | Former smokers | Current moderate smokers | Current heavy smokers | All individuals |
|----------------------------|----------------|--------------------------|-----------------------|-----------------|
| Current cigarettes per day | 0              | 1-14                     | >14                   | –               |
| Number of individuals (%)  | 657 (20%)      | 1,261 (38%)              | 1,382 (42%)           | 3,300 (100%)    |
| Age enrolled               | 60 (9)         | 54 (6)                   | 53 (6)                | 55 (7)          |
| Gender, % male             | 48%            | 53%                      | 63%                   | 56%             |
| Body-mass index            | 30 (7)         | 29 (7)                   | 29 (6)                | 29 (7)          |
| Pack-years smoked          | 39 (22)        | 32 (20)                  | 44 (21)               | 38 (22)         |
| Smoking duration, years    | 34 (10)        | 37 (8)                   | 36 (8)                | 36 (8)          |
| Global African ancestry, % | 79% (12%)      | 81% (10%)                | 80% (11%)             | 80% (11%)       |

Dataset characteristics are presented for each smoking status separately and for all individuals. Values for a quantitative characteristic are given as the mean (standard deviation).

**Table 2. Top local ancestry segments-smoking interactions**

| Locus        | Ancestry segment        | Exposure             | Multi-trait P          | Top single-trait P     | Top trait                    |
|--------------|-------------------------|----------------------|------------------------|------------------------|------------------------------|
| 11p15.2-3    | 12,075,829-12,845,835   | Current smoker       | 2.8x10 <sup>-5</sup> * | 5.8x10 <sup>-6</sup> * | FEV <sub>1</sub> % predicted |
| 2q37.3       | 238,143,387-238,769,892 | Current heavy smoker | 2.9x10 <sup>-5</sup> * | 2.5x10 <sup>-6</sup> * | FEV <sub>1</sub>             |
| 13q12.3-13.1 | 31,623,839-32,256,475   | Current heavy smoker | 3.4x10 <sup>-5</sup>   | 0.0052                 | FVC                          |
| 11q21        | 94,360,812-94,825,729   | Current heavy smoker | 5.1x10 <sup>-5</sup>   | 0.0028                 | FEV <sub>1</sub>             |
| 7p15.2-3     | 25,133,849-26,371,279   | Current heavy smoker | 1.3x10 <sup>-4</sup>   | 2.82x10 <sup>-4</sup>  | FEV <sub>1</sub> % predicted |
| 8q21.13      | 81,871,222-82,335,354   | Current heavy smoker | 2.0x10 <sup>-4</sup>   | 0.24                   | FVC                          |
| 1q44         | 248,020,448-249,208,153 | Current smoker       | 3.2x10 <sup>-4</sup>   | 0.0029                 | FEV <sub>1</sub> /FVC        |

Top signals from two admixture mappings of ancestry-smoking interactions, where environment exposure is either current smoker or current heavy smoker. Genome-wide significant association signals with p-value below the effective Bonferroni threshold  $0.05/1,635 = 3.06 \times 10^{-5}$  are denoted with the “\*” mark, where 1,635 is the effective number of tests estimated by the eigenMT method<sup>18</sup>.

**Table 3. Top SNP-smoking interactions in regions identified by admixture mapping**

| Locus        | SNP        | Position    | Type       | Gene                   | Anc. Z <sup>a</sup> | Anc. P <sup>a</sup>    | SNP Z <sup>b</sup> | SNP P <sup>b</sup> | Allele | Freq <sub>CEU/YRI</sub> |
|--------------|------------|-------------|------------|------------------------|---------------------|------------------------|--------------------|--------------------|--------|-------------------------|
| 11p15.2-3    | rs933920   | 12,481,110  | intronic   | PARVA <sup>26,27</sup> | 4.32                | 1.6 x 10 <sup>-5</sup> | 2.91               | 0.0036             | C/T    | 0.99/0.89               |
| 11p15.2-3    | rs4553350  | 12,759,834  | intronic   | TEAD1                  | 4.20                | 2.7 x 10 <sup>-5</sup> | -2.83              | 0.0046             | C/T    | 0.55/0.95               |
| 2q37.3       | rs7569427  | 238,413,338 | intronic   | MLPH                   | 4.63                | 3.7 x 10 <sup>-6</sup> | -2.33              | 0.020              | A/G    | 0.94/0.28               |
| 2q37.3       | rs2280289  | 238,483,729 | missense   | RAB17 <sup>28,29</sup> | 4.71                | 2.5 x 10 <sup>-6</sup> | 2.10               | 0.036              | C/T    | 0.84/0.20               |
| 13q12.3-13.1 | rs1535532  | 32,114,398  | intergenic |                        | 2.18                | 0.030                  | 2.32               | 0.020              | A/G    | 0.67/0.62               |
| 11q21        | rs11020968 | 94,602,414  | missense   | AMOTL1 <sup>31</sup>   | 2.77                | 0.0056                 | -2.11              | 0.035              | A/T    | 0.84/1.00               |
| 7p15.2-3     | rs10270076 | 25,363,037  | intergenic |                        | 3.31                | 9.3 x 10 <sup>-4</sup> | -2.83              | 0.0046             | A/G    | 0.57/0.29               |
| 8q21.13      | rs7000934  | 82,123,005  | intergenic |                        | -1.17               | 0.24                   | -2.38              | 0.017              | C/T    | 0/0.15                  |
| 1q44         | rs7533237  | 248,298,552 | intergenic |                        | -2.54               | 0.011                  | -2.83              | 0.0046             | G/T    | 0/0.11                  |

Top SNP-smoking interaction signals for 7 loci identified by admixture mapping. Two top SNPs are listed for the two genome-wide significant loci (the first four rows). The reference allele frequencies in two CEU (European) and YRI (African) populations from the 1,000 Genomes Projects are presented for each SNP in the last two columns.

<sup>a</sup>Z-scores and p-values are reported for the effects of local ancestry-exposure interactions.

<sup>b</sup>Z-scores and p-values are reported for the effects of SNP-exposure interactions.

## Figures

### Figure 1. The African ancestry of African American participants of the COPDGene project.

(a) The distribution of local ancestry is plotted by physical position in the genome on X axis. For each local ancestry segment the proportions of individuals with two African chromosomes (light green color), one African chromosome (green color) and no African chromosomes (dark green color) are presented on Y axis. (b) The distribution of the global African ancestry among 3,300 African-American individuals in the COPDGene study is shown. The vertical red dashed line depicts the mean value, 0.803.

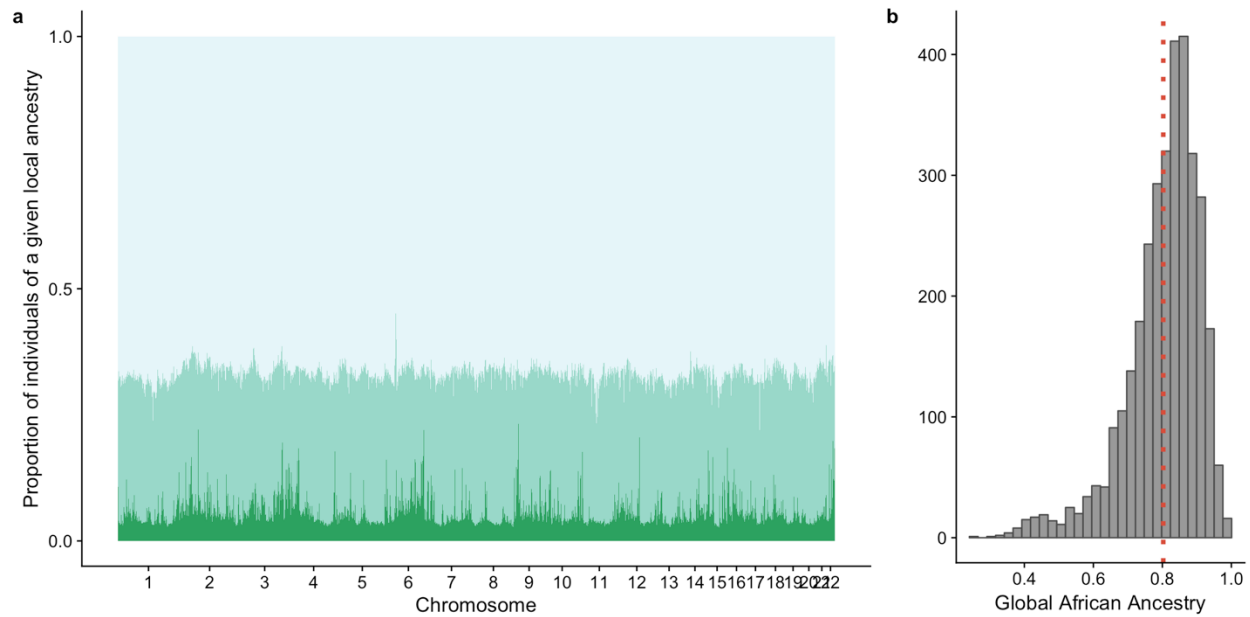

**Figure 2. Robustness of mixed-model admixture mapping assessed by quantile-quantile (QQ) plots.**

The linear mixed model is examined through different combinations of random genetic and heterogeneity effects denoted in equations as  $u_m$ ,  $u_i$  and  $u_h$ , while labeled on the plots as ARM, EARM and Het. (see Equation 1 and **Supplementary Table S1**). Admixture mapping is conducted for FEV<sub>1</sub> % predicted phenotype, and current smoker status is used in evaluation of ancestry-smoking interactions. (a) When testing marginal effects of ancestry, the distribution of the test statistics is not inflated only when the genetic random effect (ARM) is presented in the model ( $\lambda = 1.04$  or  $1.02$ ). (b) When testing ancestry-smoking interaction effects, all three random effects (ARM, EARM and Het.) are necessary to mitigate the inflation ( $\lambda = 1.06$ ).

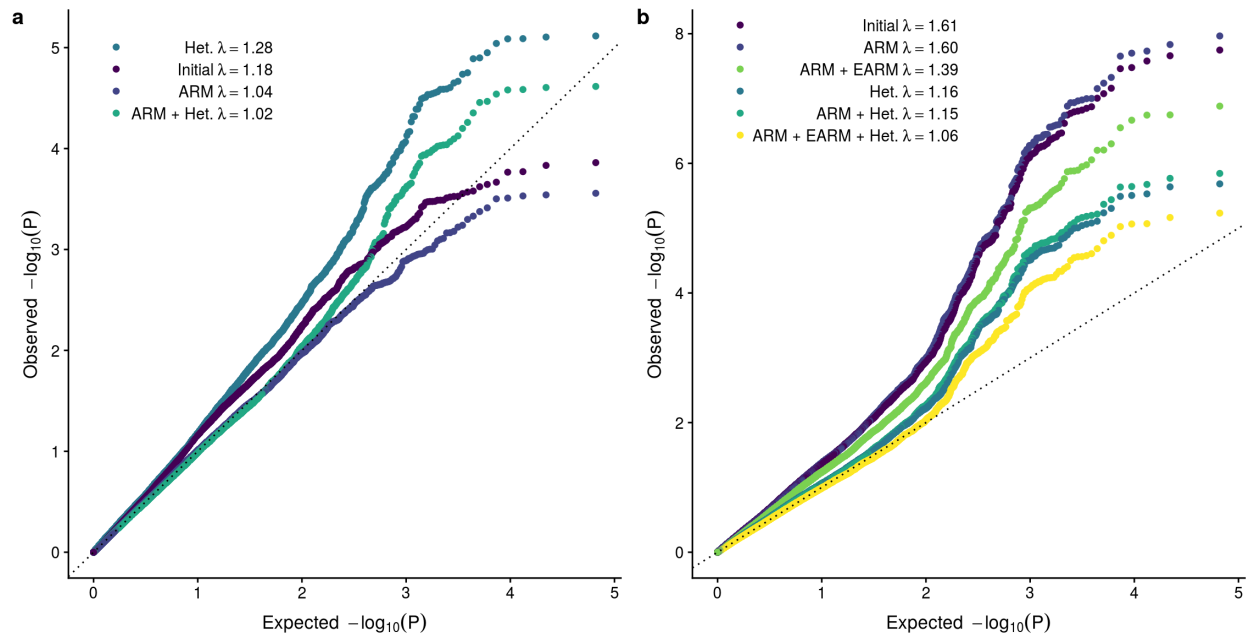

**Figure 3. Admixture mapping identifies two genome-wide significant and five suggestive loci of local ancestry-smoking interactions.**

Manhattan plots show results of two admixture mappings of ancestry-smoking interactions, where smoking is one of two binary variables: (a) current smokers vs. non-smokers, and (b) current moderate smokers vs. current heavy smokers. The multivariate test joins the single-trait test statistics from five traits under the composite null hypothesis of no association and provides the multi-trait p-values. Horizontal lines depict the effective Bonferroni threshold ( $0.05/1,635 = 3.06 \times 10^{-5}$ ) and the effective suggestive Bonferroni threshold ( $0.5/1,635 = 3.06 \times 10^{-4}$ ), where 1,635 is the effective number of tests estimated by the eigenMT method<sup>18</sup>.

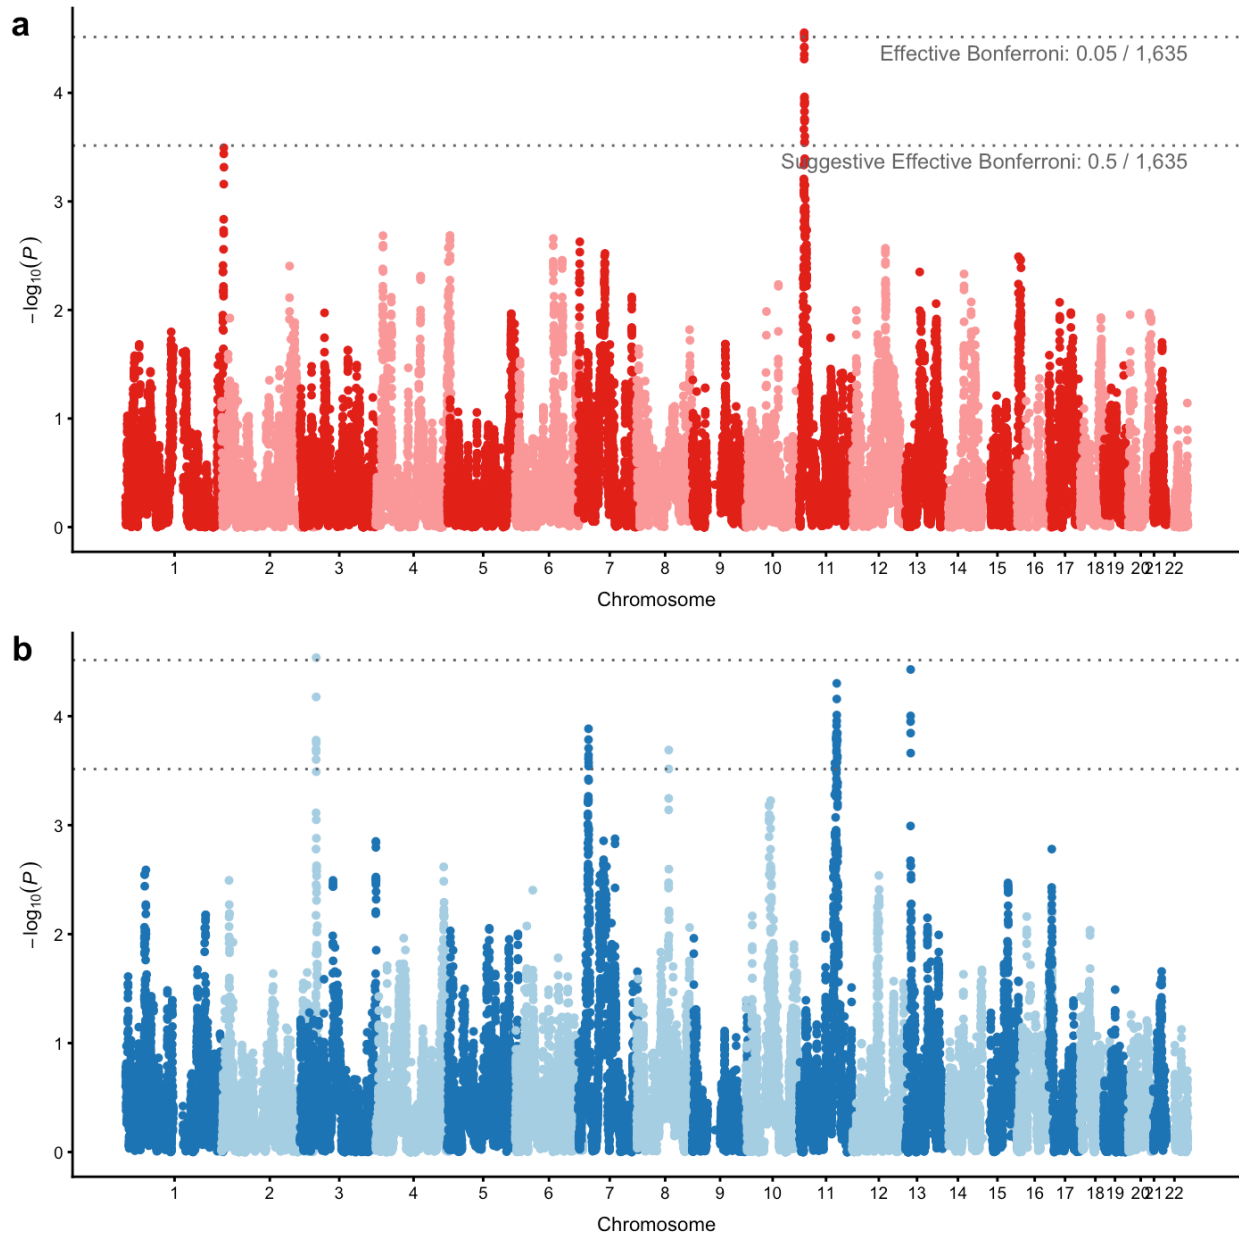

#### Figure 4. Detailed regional association plots for three selected loci 11p15.2-3, 2q37.3 and 11q21.

From top to bottom, each panel shows (i) the regional association plot; (ii) linkage disequilibrium pattern; (iii) annotated protein-coding genes; (iv) trans-continental differences in allele frequency. (i) The Y axis represents  $-\log_{10}(P)$  of SNP association tests using a single phenotype most strongly associated with the ancestry segment in the locus. The shaded area represents the strength of local ancestry association in the multi-trait admixture mapping with stronger associations painted by darker shades of grey. The blue diamonds represent the Bayes factors for assessing the evidence that a SNP is causal estimated by FINEMAP; the bigger the diamond the higher the Bayes factor. (ii) The  $r^2$ -based LD heatmap is built using genotypes of the COPDGene study, and the gradient of red is proportional to the  $r^2$ . (iii) Protein-coding genes are queried from [grch37.ensembl.org](http://grch37.ensembl.org) (iv) Allele frequencies are estimated in the 1,000 Genomes Project for European and African populations. For each SNP in an ancestry segment, the cyan indicates the frequency of the European minor allele variant, while a vertical segment connects the European and African frequencies of the allele. The segments are colored according to the direction of the difference: red when the African frequency is higher than the European frequency, or green for lower African frequency.

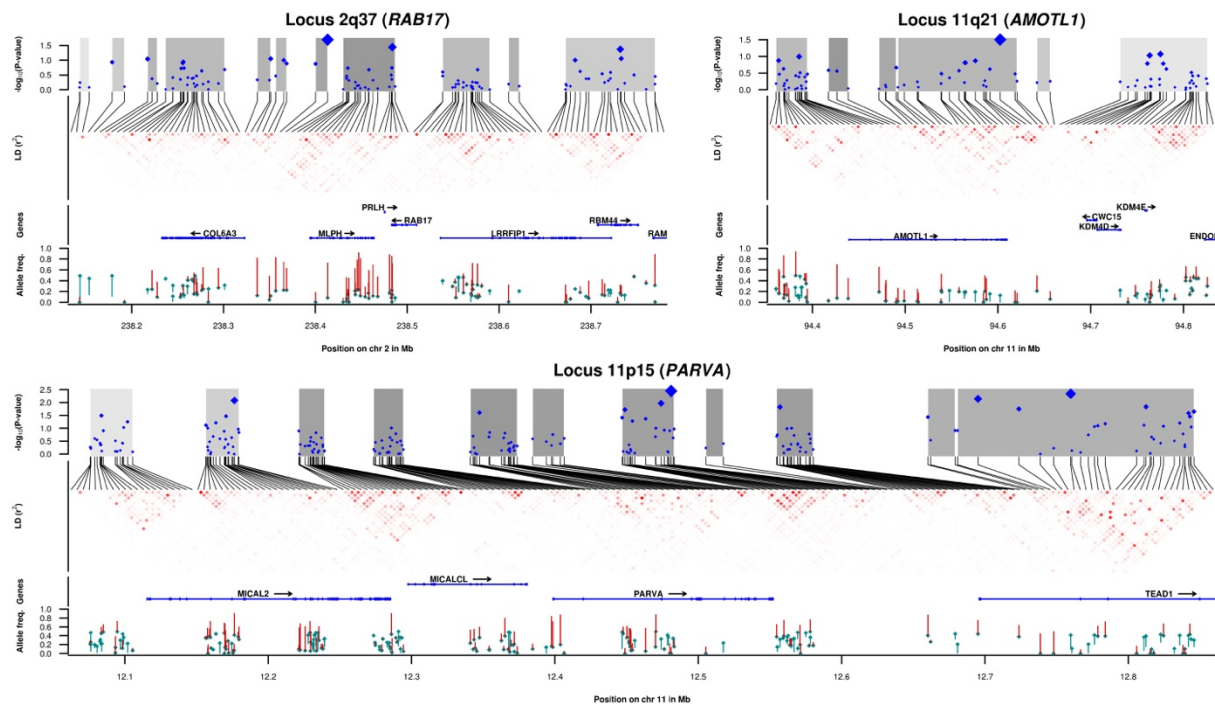



## References

1. Kessler MD, Yerges-Armstrong L, Taub MA, et al. Challenges and disparities in the application of personalized genomic medicine to populations with African ancestry. *Nat Commun.* 2016;7. doi:10.1038/ncomms12521.
2. Popejoy AB, Fullerton SM. Genomics is failing on diversity. *Nature.* 2016;538(7624):161-164. doi:10.1038/538161a.
3. Bustamante CD, De La Vega FM, Burchard EG. Genomics for the world. *Nature.* 2011;475(7355):163-165. doi:10.1038/475163a.
4. Hindorff LA, Bonham VL, Brody LC, et al. Prioritizing diversity in human genomics research. *Nat Rev Genet.* 2018;19(3):175-185. doi:10.1038/nrg.2017.89.
5. McKeigue PM. Prospects for Admixture Mapping of Complex Traits. *Am J Hum Genet.* 2005;76(1):1-7. doi:10.1086/426949.
6. Seldin MF, Pasaniuc B, Price AL. New approaches to disease mapping in admixed populations. *Nat Rev Genet.* 2011;12(8):523-528. doi:10.1038/nrg3002.
7. Amundadottir LT, Sulem P, Gudmundsson J, et al. A common variant associated with prostate cancer in European and African populations. *Nat Genet.* 2006;38(6):652-658. doi:10.1038/ng1808.
8. Freedman ML, Haiman CA, Patterson N, et al. Admixture mapping identifies 8q24 as a prostate cancer risk locus in African-American men. *Proc Natl Acad Sci.* 2006;103(38):14068-14073. doi:10.1073/pnas.0605832103.
9. Gudmundsson J, Sulem P, Manolescu A, et al. Genome-wide association study identifies a second prostate cancer susceptibility variant at 8q24. *Nat Genet.* 2007;39(5):631-637. doi:10.1038/ng1999.
10. Kao WHL, Klag MJ, Meoni LA, et al. MYH9 is associated with nondiabetic end-stage renal disease in African Americans. *Nat Genet.* 2008;40(10):1185-1192. doi:10.1038/ng.232.
11. Molineros JE, Maiti AK, Sun C, et al. Admixture Mapping in Lupus Identifies Multiple Functional Variants within IFIH1 Associated with Apoptosis, Inflammation, and Autoantibody Production. *PLoS Genet.* 2013;9(2). doi:10.1371/journal.pgen.1003222.
12. Kopp JB, Smith MW, Nelson GW, et al. MYH9 is a major-effect risk gene for focal segmental glomerulosclerosis. *Nat Genet.* 2008;40(10):1175-1184. doi:10.1038/ng.226.
13. Margaret M. Parker. Admixture Mapping Identifies a Quantitative Trait Locus Associated with FEV1/FVC in the COPD Gene Study. *October.* 2014;454(1):42-54. doi:10.1097/OPX.0b013e3182540562.The.
14. Rona RJ, Gulliford MC, Chinn S. Effects of prematurity and intrauterine growth on respiratory health and lung function in childhood. *BMJ.* 1993;306(6881):817-820. doi:10.1136/bmj.306.6881.817.
15. Raby BA. Low-Normal Gestational Age as a Predictor of Asthma at 6 Years of Age. *Pediatrics.* 2004;114(3):e327-e332. doi:10.1542/peds.2003-0838-L.
16. Kumar R, Seibold MA, Aldrich MC, et al. Genetic Ancestry in Lung-Function Predictions. *N Engl J Med.* 2010;363(4):321-330. doi:10.1056/NEJMoa0907897.
17. Aldrich MC, Kumar R, Colangelo LA, et al. Genetic ancestry-smoking interactions and lung function in African Americans: A cohort Study. *PLoS One.* 2012;7(6). doi:10.1371/journal.pone.0039541.
18. Aschard H, Gusev A, Brown R, Pasaniuc B. Leveraging local ancestry to detect gene-gene interactions in genome-wide data. *BMC Genet.* 2015;16(1):124. doi:10.1186/s12863-015-0283-z.
19. Burchard EG, Ziv E, Coyle N, et al. The Importance of Race and Ethnic Background in Biomedical Research and Clinical Practice. *N Engl J Med.* 2003;348(12):1170-1175.

- doi:10.1056/NEJMs025007.
20. Reiner AP, Carlson CS, Ziv E, Iribarren C, Jaquish CE, Nickerson DA. Genetic ancestry, population sub-structure, and cardiovascular disease-related traits among African-American participants in the CARDIA Study. *Hum Genet.* 2007;121(5):565-575. doi:10.1007/s00439-007-0350-2.
  21. Shaffer JR, Kammerer CM, Reich D, et al. Genetic markers for ancestry are correlated with body composition traits in older African Americans. *Osteoporos Int.* 2007;18(6):733-741. doi:10.1007/s00198-006-0316-6.
  22. Parker MM, Foreman MG, Abel HJ, et al. Admixture mapping identifies a quantitative trait locus associated with FEV1/FVC in the COPD Gene Study. *Genet Epidemiol.* 2014;38(7):652-659. doi:10.1002/gepi.21847.
  23. Regan E a, Hokanson JE, Murphy JR, et al. Genetic Epidemiology of COPD (COPD Gene) Study Design. *Epidemiology.* 2011;7(1):1-10. doi:10.3109/15412550903499522.Genetic.
  24. Colonna V, Ayub Q, Chen Y, et al. Human genomic regions with exceptionally high levels of population differentiation identified from 911 whole-genome sequences. *Genome Biol.* 2014;1-14. doi:10.1186/gb-2014-15-6-r88.
  25. Korenbaum E, Olski TM, Noegel a a. Genomic organization and expression profile of the parvin family of focal adhesion proteins in mice and humans. *Gene.* 2001;279(1):69-79. doi:S0378-1119(01)00743-0 [pii].
  26. Buro-Auriemma LJ, Salit J, Hackett NR, et al. Cigarette smoking induces small airway epithelial epigenetic changes with corresponding modulation of gene expression. *Hum Mol Genet.* 2013;22(23):4726-4738. doi:10.1093/hmg/ddt326.
  27. Qiu W, Wan E, Morrow J, et al. The impact of genetic variation and cigarette smoke on DNA methylation in current and former smokers from the COPD Gene study. *Epigenetics.* 2015;10(11):1064-1073. doi:10.1080/15592294.2015.1106672.
  28. Uhl GR, Liu Q-R, Drgon T, et al. Molecular genetics of successful smoking cessation: convergent genome-wide association study results. *Arch Gen Psychiatry.* 2008;65(6):683-693. doi:10.1001/archpsyc.65.6.683.
  29. Rose JE, Behm FM, Drgon T, Johnson C, Uhl GR. Personalized Smoking Cessation: Interactions between Nicotine Dose, Dependence and Quit-Success Genotype Score. *Mol Med.* 2010;16(7-8):1. doi:10.2119/molmed.2009.00159.
  30. Suzuki R, Nakamura Y, Chiba S, et al. Mitigation of tight junction protein dysfunction in lung microvascular endothelial cells with pitavastatin. *Pulm Pharmacol Ther.* 2016;38:27-35. doi:10.1016/j.pupt.2016.04.003.
  31. Aschard H. SI:A perspective on interaction effects in genetic association studies. *Genet Epidemiol.* 2016;40(8):678-688. doi:10.1002/gepi.21989.
  32. Szulc P, Bogdan M, Frommlet F, Tang H. Joint genotype- and ancestry-based genome-wide association studies in admixed populations. *Genet Epidemiol.* 2017;41(6):555-566. doi:10.1002/gepi.22056.
  33. Kang HM, Sul JH, Service SK, et al. Variance component model to account for sample structure in genome-wide association studies. *Nat Genet.* 2010;42(4):348-354. doi:10.1038/ng.548.
  34. Sul JH, Bilow M, Yang W-Y, et al. Accounting for Population Structure in Gene-by-Environment Interactions in Genome-Wide Association Studies Using Mixed Models. *PLoS Genet.* 2016;12(3):e1005849. doi:10.1371/journal.pgen.1005849.
  35. Shriner D. Overview of admixture mapping. *Curr Protoc Hum Genet.* 2017;2017(July):1.23.1-1.23.8. doi:10.1002/cphg.44.
  36. Listgarten J, Lippert C, Kadie CM, Davidson RI, Eskin E, Heckerman D. Improved linear mixed models for genome-wide association studies. *Nat Methods.* 2013;9(6):525-526. doi:10.1038/nmeth.2037.Improved.

37. Baran Y, Pasaniuc B, Sankararaman S, et al. Fast and accurate inference of local ancestry in Latino populations. *Bioinformatics*. 2012;28(10):1359-1367. doi:10.1093/bioinformatics/bts144.
38. Auton A, Abecasis GR, Altshuler DM, et al. A global reference for human genetic variation. *Nature*. 2015;526(7571):68-74. doi:10.1038/nature15393.
39. LAMP-LD Authors. Personal Communication. 2017.
40. Pasaniuc B, Zaitlen N, Lettre G, et al. Enhanced statistical tests for GWAS in admixed populations: Assessment using african americans from CARE and a breast cancer consortium. *PLoS Genet*. 2011;7(4). doi:10.1371/journal.pgen.1001371.
41. Price AL, Tandon A, Patterson N, et al. Sensitive detection of chromosomal segments of distinct ancestry in admixed populations. *PLoS Genet*. 2009;5(6). doi:10.1371/journal.pgen.1000519.
42. Shriner D, Bentley AR, Doumatey AP, et al. Phenotypic variance explained by local ancestry in admixed African Americans. *Front Genet*. 2015;6(OCT):1-8. doi:10.3389/fgene.2015.00324.
43. Zaitlen N, Pasaniuc B, Sankararaman S, et al. Leveraging population admixture to characterize the heritability of complex traits. *Nat Genet*. 2014;46(12):1356-1362. doi:10.1038/ng.3139.
44. Devlin B, Roeder K. Genomic control for association studies. *Am J Hum Genet*. 1999;65(4):A83-A83.
45. Zhou X, Stephens M. Efficient Algorithms for Multivariate Linear Mixed Models in Genome-wide Association Studies. 2014;11(4):407-409. doi:10.1038/nmeth.2848.Efficient.
46. Province MA, Borecki IB. A correlated meta-analysis strategy for data mining "OMIC" scans. *Pac Symp Biocomput*. 2013:236-246. doi:10.1142/9789814447973\_0023.
47. Aschard H, Vilhjálmsson BJ, Grelliche N, Morange PE, Trégouët DA, Kraft P. Maximizing the power of principal-component analysis of correlated phenotypes in genome-wide association studies. *Am J Hum Genet*. 2014;94(5):662-676. doi:10.1016/j.ajhg.2014.03.016.
48. Zhu X, Feng T, Tayo BO, et al. Meta-analysis of correlated traits via summary statistics from GWASs with an application in hypertension. *Am J Hum Genet*. 2015;96(1):21-36. doi:10.1016/j.ajhg.2014.11.011.
49. Park DS, Eskin I, Kang EY, et al. An ancestry-based approach for detecting interactions. *Genet Epidemiol*. 2018;42(1):49-63. doi:10.1002/gepi.22087.
50. Altshuler DM, Durbin RM, Abecasis GR, et al. An integrated map of genetic variation from 1,092 human genomes. *Nature*. 2012;491(7422):56-65. doi:10.1038/nature11632.
51. Morelli G, Song Y, Mazzoni CJ, et al. *Yersinia pestis* genome sequencing identifies patterns of global phylogenetic diversity. *Nat Genet*. 2010;42(12):1140-1143. doi:10.1038/ng.705.
52. Benner C, Spencer CCA, Havulinna AS, Salomaa V, Ripatti S, Pirinen M. FINEMAP: Efficient variable selection using summary data from genome-wide association studies. *Bioinformatics*. 2016;32(10):1493-1501. doi:10.1093/bioinformatics/btw018.
53. Hancock, D. B., Artigas, M. S., Gharib, S. A., Henry, A., Manichaikul, A., Ramasamy, A., ... London, S. J. (2012). Genome-Wide Joint Meta-Analysis of SNP and SNP-by-Smoking Interaction Identifies Novel Loci for Pulmonary Function. *PLoS Genetics*, 8(12).
54. Shrine, Nick and Guyatt, Anna L and Erzurumluoglu, A Mesut and Jackson, Victoria E and Hobbs, Brian D and Melbourne, Carl and Batini, Chiara and Fawcett, Katherine A and Song, Kijoung and Sakornsakolpat, P. and others. (2018). New genetic signals for lung function highlight pathways and pleiotropy, and chronic obstructive pulmonary disease associations across multiple ancestries. *BioRxiv*, 343293.
55. Sakornsakolpat, P., Prokopenko, D., Lamontagne, M., Reeve, N. F., & Anna, L. (2018). Expanded genetic landscape of chronic obstructive pulmonary disease reveals heterogeneous cell type and phenotype associations. *BioRxiv*, 355644.
